# Supplementary material for: Characterization and heterologous expression of the neoabyssomicin/abyssomicin biosynthetic gene cluster from Streptomyces koyangensis SCSIO 5802
Source: PubMed Central journal article supplement (PMC5819245; doi:10.1186/s12934-018-0875-1), 2018-02-20
Supplement: 12934_2018_875_MOESM1_ESM.pdf [file 12934_2018_875_MOESM1_ESM.pdf]

**Characterization and heterologous expression of the  
neoabyssomicin/abyssomicin biosynthetic gene cluster from  
*Streptomyces koyangensis* SCSIO 5802**

Jiajia Tu<sup>1,2+</sup>, Siting Li<sup>1,3+</sup>, Jiang Chen<sup>1,4</sup>, Yongxiang Song<sup>1</sup>, Shaobin Fu<sup>2</sup>, Jianhua Ju<sup>1,4</sup>

and Qinglian Li<sup>1\*</sup>

<sup>1</sup>CAS Key Laboratory of Tropical Marine Bio-resources and Ecology, Guangdong Key Laboratory of Marine Materia Medica, RNAM Center for Marine Microbiology, South China Sea Institute of Oceanology, Chinese Academy of Sciences, 164 West Xingang Road, Guangzhou 510301, China.

<sup>2</sup>School of Pharmacy, Zunyi Medical University, 201 Dalian Road, Zunyi 563000, China.

<sup>3</sup>College of Bio and Marine Sciences, Shenzhen University, 3688 Nanhai Ave, Shenzhen 518060, China.

<sup>4</sup>University of Chinese Academy of Sciences, 19 Yuquan Road, Beijing 110039, China.

<sup>+</sup>Equal contributors

\*To whom correspondence should be addressed. Tel. /Fax: +86-20-34066449; E-mail: [liql@scsio.ac.cn](mailto:liql@scsio.ac.cn).

Email addresses of all co-authors:

Jiajia Tu: [1152492875@qq.com](mailto:1152492875@qq.com); Siting Li: [li\\_sting@qq.com](mailto:li_sting@qq.com); Jiang Chen: [chenjluck@126.com](mailto:chenjluck@126.com); Yongxiang Song: [songx@scsio.ac.cn](mailto:songx@scsio.ac.cn); Shaobin Fu: [407683156@qq.com](mailto:407683156@qq.com); Jianhua Ju: [jj@scsio.ac.cn](mailto:jj@scsio.ac.cn); Qinglian Li: [liql@scsio.ac.cn](mailto:liql@scsio.ac.cn)

| <b>Table of Contents</b>                                                                                                                                              | <b>Pages</b> |
|-----------------------------------------------------------------------------------------------------------------------------------------------------------------------|--------------|
| <b>Table S1.</b> Bacteria used in this study.                                                                                                                         | 2-3          |
| <b>Table S2.</b> Plasmids used in this study.                                                                                                                         | 4            |
| <b>Table S3.</b> Primers used in this study.                                                                                                                          | 5-7          |
| <b>Fig. S1</b> Chemical structures of tetronate-containing natural products and the unique set of five highly conserved genes responsible for tetronate biosynthesis. | 8            |
| <b>Fig. S2</b> HPLC analyses of fermentation extracts of the inactivated mutants of boundary genes.                                                                   | 9            |
| <b>Fig. S3</b> Alignments of seven KS domains of AbmB1–B3.                                                                                                            | 10           |
| <b>Fig. S4</b> Alignments of five KR domains of AbmB1–B2.                                                                                                             | 11           |
| <b>Fig. S5</b> Alignments of five DH domains of AbmB1–B2.                                                                                                             | 12           |
| <b>Fig. S6</b> Alignments of seven AT domains of AbmB1–B3.                                                                                                            | 13           |
| <b>Fig. S7</b> Alignments of AbmT with the typical type II TEs.                                                                                                       | 14           |
| <b>Fig. S8</b> The 14 transmembrane helices of AbmD.                                                                                                                  | 15           |
| <b>Fig. S9</b> Alignments of AbmI with previously characterized SARP regulators.                                                                                      | 16           |
| <b>Fig. S10</b> Alignments of AbmH with previously characterized LuxR-regulators.                                                                                     | 17-18        |
| <b>Fig. S11</b> The quantitative HPLC standard curve for abyssomicin 2 ( <b>3</b> )                                                                                   | 19           |
| <b>Fig. S12–30</b> Disruption of 19 <i>abm</i> -related genes in wild-type <i>S. koyangensis</i> SCSIO 5802 <i>via</i> PCR-targeting.                                 | 20-29        |

**Table S1. Bacteria used in this study.**

| Strains                                    | Description                                                                                                                                                                                        | Source/<br>[Ref.] |
|--------------------------------------------|----------------------------------------------------------------------------------------------------------------------------------------------------------------------------------------------------|-------------------|
| <b>Streptomyces</b>                        |                                                                                                                                                                                                    |                   |
| <i>Streptomyces coelicolor</i> M1152       | Host strain for heterologous expression of the <i>abm</i> biosynthetic gene cluster                                                                                                                |                   |
| <i>Streptomyces koyangensis</i> SCSIO 5802 | Wild-type producer of neoabyssomicins/abyssomicins (1–4)                                                                                                                                           | This work         |
| $\Delta orf(-1)$                           | <i>S.koyangensis</i> SCSIO 5802 with a 900 bp fragment of <i>orf(-2)</i> substituted by <i>aac(3)IV+oriT</i> cassette                                                                              | This work         |
| $\Delta abmI$                              | <i>S.koyangensis</i> SCSIO 5802 with a 609 bp fragment of <i>abmI</i> substituted by a <i>aac(3)IV+oriT</i> cassette                                                                               | This work         |
| $\Delta abmF4$                             | <i>S.koyangensis</i> SCSIO 5802 with a 1005 bp fragment of <i>abmF4</i> substituted by <i>aac(3)IV+oriT</i> cassette                                                                               | This work         |
| $\Delta abmF3$                             | <i>S.koyangensis</i> SCSIO 5802 with a 837 bp fragment of <i>abmF3</i> substituted by <i>aac(3)IV+oriT</i> cassette                                                                                | This work         |
| $\Delta abmF2$                             | <i>S.koyangensis</i> SCSIO 5802 with a 684 bp fragment of <i>abmF2</i> substituted by <i>aac(3)IV+oriT</i> cassette                                                                                | This work         |
| $\Delta abmF1$                             | <i>S.koyangensis</i> SCSIO 5802 with a 1545 bp fragment of <i>abmF1</i> substituted by <i>aac(3)IV+oriT</i> cassette                                                                               | This work         |
| $\Delta abmD$                              | <i>S.koyangensis</i> SCSIO 5802 with a 1173 bp fragment of <i>abmD</i> substituted by <i>aac(3)IV+oriT</i> cassette                                                                                | This work         |
| $\Delta abmA1$                             | <i>S.koyangensis</i> SCSIO 5802 with a 624 bp fragment of <i>abmA1</i> substituted by <i>aac(3)IV+oriT</i> cassette                                                                                | This work         |
| $\Delta abmA2$                             | <i>S.koyangensis</i> SCSIO 5802 with a 1629 bp fragment of <i>abmA2</i> substituted by <i>aac(3)IV+oriT</i> cassette                                                                               | This work         |
| $\Delta abmA3$                             | <i>S.koyangensis</i> SCSIO 5802 with a 138 bp fragment of <i>abmA3</i> substituted by <i>aac(3)IV+oriT</i> cassette                                                                                | This work         |
| $\Delta abmA4$                             | <i>S.koyangensis</i> SCSIO 5802 with a 507 bp fragment of <i>abmA4</i> substituted by <i>aac(3)IV+oriT</i> cassette                                                                                | This work         |
| $\Delta abmA5$                             | <i>S.koyangensis</i> SCSIO 5802 with a 744 bp fragment of <i>abmA5</i> substituted by <i>aac(3)IV+oriT</i> cassette                                                                                | This work         |
| $\Delta abmB1$                             | <i>S.koyangensis</i> SCSIO 5802 with a 2649 bp fragment of <i>abmB1</i> substituted by <i>aac(3)IV+oriT</i> cassette                                                                               | This work         |
| $\Delta abmH$                              | <i>S.koyangensis</i> SCSIO 5802 with a 2391 bp fragment of <i>abmH</i> substituted by <i>aac(3)IV+oriT</i> cassette                                                                                | This work         |
| $\Delta orf(+1)$                           | <i>S.koyangensis</i> SCSIO 5802 with a 1095 bp fragment of <i>orf(+1)</i> substituted by <i>aac(3)IV+oriT</i> cassette                                                                             | This work         |
| $\Delta orf(+2)$                           | <i>S.koyangensis</i> SCSIO 5802 with a 2100 bp fragment of <i>orf(+2)</i> substituted by <i>aac(3)IV+oriT</i> cassette                                                                             | This work         |
| $\Delta orf(+3)$                           | <i>S.koyangensis</i> SCSIO 5802 with a 738 bp fragment of <i>orf(+3)</i> substituted by <i>aac(3)IV+oriT</i> cassette                                                                              | This work         |
| 5802:: <i>abmI</i>                         | <i>abmI</i> overexpressed strain, derived from <i>Streptomyces koyangensis</i> SCSIO 5802                                                                                                          | This work         |
| 5802:: <i>abmH</i>                         | <i>abmH</i> overexpressed strain, derived from <i>Streptomyces koyangensis</i> SCSIO 5802                                                                                                          | This work         |
| <b>E.coli</b>                              |                                                                                                                                                                                                    |                   |
| DH5 $\alpha$                               | Host strain for general clone                                                                                                                                                                      |                   |
| BW25113/pIJ 790                            | K-12 derivative: <i>araBAD</i> , <i>rhaBAD</i> ; host strain for Red/ET-mediated recombination                                                                                                     | [1]               |
| ET12567/pU Z8002                           | <i>dam</i> , <i>dcm</i> , <i>hsdM</i> , <i>hsdS</i> , <i>hsdR</i> , <i>cat</i> <sup>R</sup> , <i>tef</i> <sup>R</sup> ; donor strain for conjugation between <i>E.coli</i> and <i>Streptomyces</i> | [2]               |

---

XL 1-Blue  
MR

Host strain for construction of genomic cosmid library

Stratagene

---

**Table S2. Plasmids used in this study.**

| Plasmids          | Description                                                                                                                                                                 | Source/<br>[Ref.] |
|-------------------|-----------------------------------------------------------------------------------------------------------------------------------------------------------------------------|-------------------|
| <b>Plasmids</b>   |                                                                                                                                                                             |                   |
| pIJ773            | <i>aac(3)IV</i> (AprR), <i>oriT</i> ; used for amplifying the <i>aac(3)IV-oriT</i> gene cassette for gene inactivation                                                      | [3]               |
| pL646             | Derived from pSET152, containing <i>ermE</i> *P promoter and the ribosome-binding site of the <i>tufI</i> gene, used for overexpression of <i>abmI</i> and <i>abmH</i> gene | [4]               |
| SuperCos1         | Used for construction of genomic cosmid library                                                                                                                             | Stratagene        |
| cosmid 9-7C       | A cosmid which contains partial <i>abm</i> biosynthetic cluster                                                                                                             | This work         |
| cosmid 6-7F       | A cosmid which contains partial <i>abm</i> biosynthetic cluster                                                                                                             | This work         |
| cosmid 21-9A      | A cosmid which contains partial <i>abm</i> biosynthetic cluster                                                                                                             | This work         |
| pΔ <i>orf(-1)</i> | A 900 bp fragment in <i>orf(-1)</i> in cosmid 6-7F was substituted by the <i>aac(IV)+oriT</i> cassette                                                                      | This work         |
| pΔ <i>abmI</i>    | A 609 bp fragment in <i>abmI</i> in cosmid 6-7F was substituted by the <i>aac(IV)+oriT</i> cassette                                                                         | This work         |
| pΔ <i>abmF4</i>   | A 1005 bp fragment in <i>abmF4</i> in cosmid 6-7F was substituted by the <i>aac(IV)+oriT</i> cassette                                                                       | This work         |
| pΔ <i>abmF3</i>   | A 837 bp fragment in <i>abmF3</i> in cosmid 6-7F was substituted by the <i>aac(IV)+oriT</i> cassette                                                                        | This work         |
| pΔ <i>abmF2</i>   | A 684 bp fragment in <i>abmF2</i> in cosmid 9-7C was substituted by the <i>aac(IV)+oriT</i> cassette                                                                        | This work         |
| pΔ <i>abmF1</i>   | A 1545 bp fragment in <i>abmF1</i> in cosmid 9-7C was substituted by the <i>aac(IV)+oriT</i> cassette                                                                       | This work         |
| pΔ <i>abmD</i>    | A 1173 bp fragment in <i>abmD</i> in cosmid 9-7C B was substituted by the <i>aac(IV)+oriT</i> cassette                                                                      | This work         |
| pΔ <i>abmA1</i>   | A 624 bp fragment in <i>abmA1</i> in cosmid 9-7C was substituted by the <i>aac(IV)+oriT</i> cassette                                                                        | This work         |
| pΔ <i>abmA2</i>   | A 1629 bp fragment in <i>abmA2</i> in cosmid 9-7C was substituted by the <i>aac(IV)+oriT</i> cassette                                                                       | This work         |
| pΔ <i>abmA3</i>   | A 138 bp fragment in <i>abmA3</i> in cosmid 9-7C was substituted by the <i>aac(IV)+oriT</i> cassette                                                                        | This work         |
| pΔ <i>abmA4</i>   | A 507 bp fragment in <i>abmA4</i> in cosmid 9-7C was substituted by the <i>aac(IV)+oriT</i> cassette                                                                        | This work         |
| pΔ <i>abmA5</i>   | A 744 bp fragment in <i>abmA5</i> in cosmid 9-7C was substituted by the <i>aac(IV)+oriT</i> cassette                                                                        | This work         |
| pΔ <i>abmB1</i>   | A 2649 bp fragment in <i>abmB1</i> in cosmid 9-7C was substituted by the <i>aac(IV)+oriT</i> cassette                                                                       | This work         |
| pΔ <i>abmH</i>    | A 2391 bp fragment in <i>abmH</i> in cosmid 21-9A was substituted by the <i>aac(IV)+oriT</i> cassette                                                                       | This work         |
| pΔ <i>orf(+1)</i> | A 1095 bp fragment in <i>orf(+1)</i> in cosmid 21-9A was substituted by the <i>aac(IV)+oriT</i> cassette                                                                    | This work         |
| pΔ <i>orf(+2)</i> | A 2100 bp fragment in <i>orf(+1)</i> in cosmid 21-9A was substituted by the <i>aac(IV)+oriT</i> cassette                                                                    | This work         |
| pΔ <i>orf(+3)</i> | A 738 bp fragment in <i>orf(+3)</i> in cosmid 21-9A was substituted by the <i>aac(IV)+oriT</i> cassette                                                                     | This work         |

**Table S3. Primers used in this study.**

| Name               | Sequence (5'-3')                                                | Purpose                                                           |
|--------------------|-----------------------------------------------------------------|-------------------------------------------------------------------|
| screen- abmB1-F    | GCTGCGGAGTTGGTGGAGGA                                            | For screening the <i>S.koyangensis</i> SCSIO 5802 genomic library |
| screen- abmB1-R    | ACTGCGGTGTCGAGGAGGGA                                            |                                                                   |
| screen- orf(-2)-F  | GCGGAGTTCGAGATCAAGCC                                            | For screening the <i>S.koyangensis</i> SCSIO 5802 genomic library |
| screen- orf((-2)-R | CTGGAGCACCGTCTGGGAGG                                            |                                                                   |
| screen- orf(+3)-F  | TGGAGCAGCAGGGGCACA                                              | For screening the <i>S.koyangensis</i> SCSIO 5802 genomic library |
| screen- orf(+3)-R  | GCTGCTCGTCCTCTCTACACC                                           |                                                                   |
| orf(-1)-Del-F      | GTGCTGCTGATCCTCTCGCTGGCGGGAGCGTCGGCGTACATTCCGGG<br>GATCCGTCGACC | For disrupting <i>orf(-1)</i>                                     |
| orf(-1)-Del-R      | GACCATGACGCCGGGGTGAAGTGGAGGCGCCCCTTGAGTGTAGGC<br>TGGAGCTGCTTC   |                                                                   |
| abmI-Del-F         | GAAGAGGGCGTCGCCGGGGTTCGAGGCCAGTTCTTCGCGATTCCGG<br>GGATCCGTCGACC | For disrupting <i>abmI</i>                                        |
| abmI-Del-R         | TTCCTCGACTGGCGCGAGCCGCGAGCGGCGATCCGGCCTGTAGGC<br>TGGAGCTGCTTC   |                                                                   |
| abmF3-Del-F        | ctcccgcagtcgggggtcgacacccgtagagccctcATTCCGGGGATCCGTCGACC        | For disrupting <i>abmF3</i>                                       |
| abmF3-Del-R        | accgccctgtgggtgacacccggctcctcgcggtcTGTAGGCTGGAGCTGCTTC          |                                                                   |
| abmF2-Del-F        | tgctcccgcagtcgggggtcgacacccgtagagcccATTCCGGGGATCCGTCGACC        | For disrupting <i>abmF2</i>                                       |
| abmF2-Del-R        | cgcacgaccgccctgtgggtgacacccggctcctcTGTAGGCTGGAGCTGCTTC          |                                                                   |
| abmF1-Del-F        | cccaccaggtcacgtcgtggaacagcgatacgcgtgATTCCGGGGATCCGTCGACC        | For disrupting <i>abmF1</i>                                       |
| abmF1-Del-R        | tccccgtcccggcgggcggcagagcgtccgcgcgTGTAGGCTGGAGCTGCTTC           |                                                                   |
| abmD-Del-F         | gtcaacgtcggcatcgactccctgggcaagagtcgacATTCCGGGGATCCGTCGACC       | For disrupting <i>abmD</i>                                        |
| abmD-Del-R         | gatgacggccgcgccacgaccaccagaagcgtggtgTGTAGGCTGGAGCTGCTTC         |                                                                   |
| abmA1-Del-F        | atggacgccctgtgggagcagtggtcgacgacctcattcATTCCGGGGATCCGTCGACC     | For disrupting <i>abmA1</i>                                       |
| abmA1-Del-R        | caggcctgttcgagctggaagaagctgagccgtgccTGTAGGCTGGAGCTGCTTC         |                                                                   |
| abmA2-Del-F        | ctggccgagccgacgagccgaactcggcgcgggaATTCCGGGGATCCGTCGACC          | For disrupting <i>abmA2</i>                                       |
| abmA2-Del-R        | gtccagggcggcaccggtgtcggcggcggaagccgtgTGTAGGCTGGAGCTGCTTC        |                                                                   |
| abmA3-Del-F        | tcccacgacggctcgtcactcctccgcgaggaagtgATTCCGGGGATCCGTCGACC        | For disrupting <i>abmA3</i>                                       |
| abmA3-Del-R        | gcccacggccagcgtagaggtgctccaggtcTGTAGGCTGGAGCTGCTTC              |                                                                   |
| abmA4-Del-F        | cacctggacaccgaggtcgacatgaccgctcctcgcATTCCGGGGATCCGTCGACC        | For disrupting <i>abmA4</i>                                       |
| abmA4-Del-R        | ctccagggcggccttgatcggcgaggacgtccggcTGTAGGCTGGAGCTGCTTC          |                                                                   |

|               |                                                            |                                                |
|---------------|------------------------------------------------------------|------------------------------------------------|
| abmA5-Del-F   | ggcgaccggctcggcaggaggacacacctctggcgccATTCCGGGGATCCGTCGACC  | For disrupting <i>abmA5</i>                    |
| abmA5-Del-R   | caggctggctcggtcagggtggcggggtgagccgtggacTGTAGGCTGGAGCTGCTTC |                                                |
| abmT-Del-F    | ctctctgcttccaccacgccggcgccaccgcctcggcATTCCGGGGATCCGTCGACC  | For disrupting <i>abmT</i>                     |
| abmT-Del-R    | ctggcgctccctgatgaacaggtgtccgccgggcacggtTGTAGGCTGGAGCTGCTTC |                                                |
| abmB1-Del-F   | tacaagaccgctgccctaccgctccgaccgggacagcATTCCGGGGATCCGTCGACC  | For disrupting <i>abmB1</i>                    |
| abmB1-Del-R   | cgccgtgtcgtgcccctcgggtcgtggggcagcggTGTAGGCTGGAGCTGCTTC     |                                                |
| abmH-Del-F    | gcttccctggactgccattggtgctcggcctccctATTCCGGGGATCCGTCGACC    | For disrupting <i>abmH</i>                     |
| abmH-Del-R    | gaggcaggagaggtcgagccgtcggcggggagcgtTGTAGGCTGGAGCTGCTTC     |                                                |
| orf(+1)-Del-F | cttgaccgggtggcagattggcctgttggcagaataATTCCGGGGATCCGTCGACC   | For disrupting <i>orf(+1)</i>                  |
| orf(+1)-Del-R | cgggagctgatgagccgactggaagagtcctgtcgtaTGTAGGCTGGAGCTGCTTC   |                                                |
| orf(+2)-Del-F | cgcgcccttctcgggcttccatctcgacaggagctcATTCCGGGGATCCGTCGACC   | For disrupting <i>orf(+2)</i>                  |
| orf(+2)-Del-R | gacatcacggagacacaccggggtacgtggccgcgctcTGTAGGCTGGAGCTGCTTC  |                                                |
| orf(+3)-Del-F | gctgatgaagaccgacgggtcgaggacgcggaggcgaATTCCGGGGATCCGTCGACC  | For disrupting <i>orf(+3)</i>                  |
| orf(+3)-Del-R | gtcgctcctgcggctgtggcaccgatctccacatcTGTAGGCTGGAGCTGCTTC     |                                                |
| orf(-1)-TF    | TGCCCAAACGGCTCCTCA                                         | For verifying the disruption of <i>orf(-1)</i> |
| orf(-1)-TR    | CCGGTGCCCTTCTTCTCCAC                                       |                                                |
| abmI-TF       | TTTGATCTGTTTCCGATGACGC                                     | For verifying the disruption of <i>abmI</i>    |
| abmI-TR       | CGAGAAGTGGTGCTCCGTGA                                       |                                                |
| abmF3-TF      | GCGTCGAAGACGAGGTGGG                                        | For verifying the disruption of <i>abmF3</i>   |
| abmF3-TR      | CGGACATCTGCGCTACTGG                                        |                                                |
| abmF2-TF      | ATCACCTTGATCCAGTCGGTGCCGG                                  | For verifying the disruption of <i>abmF2</i>   |
| abmF2-TR      | CCGGCACCGACTGGATCAAGGTGAT                                  |                                                |
| abmF1-TF      | GAGGACGACGAGGACCGC                                         | For verifying the disruption of <i>abmF1</i>   |
| abmF1-TR      | GCCGAGACTCTGGCCGAG                                         |                                                |
| abmD-TF       | CACCTCCGACTGGTTCACGC                                       | For verifying the disruption of <i>abmD</i>    |
| abmD-TR       | AGTTCACCTTGCCGGTCTCG                                       |                                                |
| abmA1-TF      | ACGGTTAGGCGCAGGGTTAGA                                      | For verifying the disruption of <i>abmA1</i>   |
| abmA1-TR      | AGCAGGTGCTGGGTGAGGGA                                       |                                                |
| abmA2-TF      | GCCGGATGACCGAACGTATCGT                                     | For verifying the disruption of <i>abmA2</i>   |
| abmA2-TR      | AGGTGGACGGGTGCCAAGGA                                       |                                                |

|            |                                                                                |                                                |
|------------|--------------------------------------------------------------------------------|------------------------------------------------|
| abmA3-TF   | CGCCGAGTTCTACCCAAGG                                                            | For verifying the disruption of <i>abmA3</i>   |
| abmA3-TR   | CGGTAGTGGTCGATCCTGTCC                                                          |                                                |
| abmA4-TF   | GGCTTCGTCGCACTCCTCC                                                            | For verifying the disruption of <i>abmA4</i>   |
| abmA4-TR   | CCCCTGTTTCCTTGATGCTGAC                                                         |                                                |
| abmA5-TF   | CGTCCTGCGGCTCAACCT                                                             | For verifying the disruption of <i>abmA5</i>   |
| abmA5-TR   | TCCCAGCCCTTGAGACCG                                                             |                                                |
| abmT-TF    | TCATCCCGCTGGAGGACTGG                                                           | For verifying the disruption of <i>abmT</i>    |
| abmT-TR    | GGAGACGGAGGCGAAGGAG                                                            |                                                |
| abmB1-TF   | AGCCAGTACGGCGCATTCC                                                            | For verifying the disruption of <i>abmB1</i>   |
| abmB1-TR   | TCAGCGAGTCGAAGCCCAGTT                                                          |                                                |
| abmH-TF    | ACATTCTGCTGAGGGAACACCG                                                         | For verifying the disruption of <i>abmH</i>    |
| abmH-TR    | GACCACAGAGCAACGGGAGC                                                           |                                                |
| orf(+1)-TF | CGTCTACCGCAAACCTCAACATC                                                        | For verifying the disruption of <i>orf(+1)</i> |
| orf(+1)-TR | TTCCGCATTGGCACTGGA                                                             |                                                |
| orf(+2)-TF | CGTTTCCAGTGCCAATGCG                                                            | For verifying the disruption of <i>orf(+2)</i> |
| orf(+2)-TR | GCGGGAGAAGACGGACGAT                                                            |                                                |
| orf(+3)-TF | ACAGCCTCCGCGTGATTCTT                                                           | For verifying the disruption of <i>orf(+3)</i> |
| orf(+3)-TR | CGTCCACCTGACCACCTTCGT                                                          |                                                |
| com-abmI-F | AAATTTCCCATATG <u>GTGCCC</u> GCCGCGCCACTCAGTAC ( <i>NdeI</i> sites underlined) | For cloning, and overexpression of <i>abmI</i> |
| com-abmI-R | ATATCGTA <u>ACTAGT</u> TCACACCGCCTGGCGTAGC ( <i>SpeI</i> sites underlined)     |                                                |
| com-abmH-F | AAATTTCCCATATG <u>gtggaggctctggcgcgatc</u> ( <i>NdeI</i> sites underlined)     | For cloning and overexpression of <i>abmH</i>  |
| com-abmH-R | TTATATA <u>CTAGT</u> tcacgccgccgccgggctc ( <i>SpeI</i> sites underlined)       |                                                |



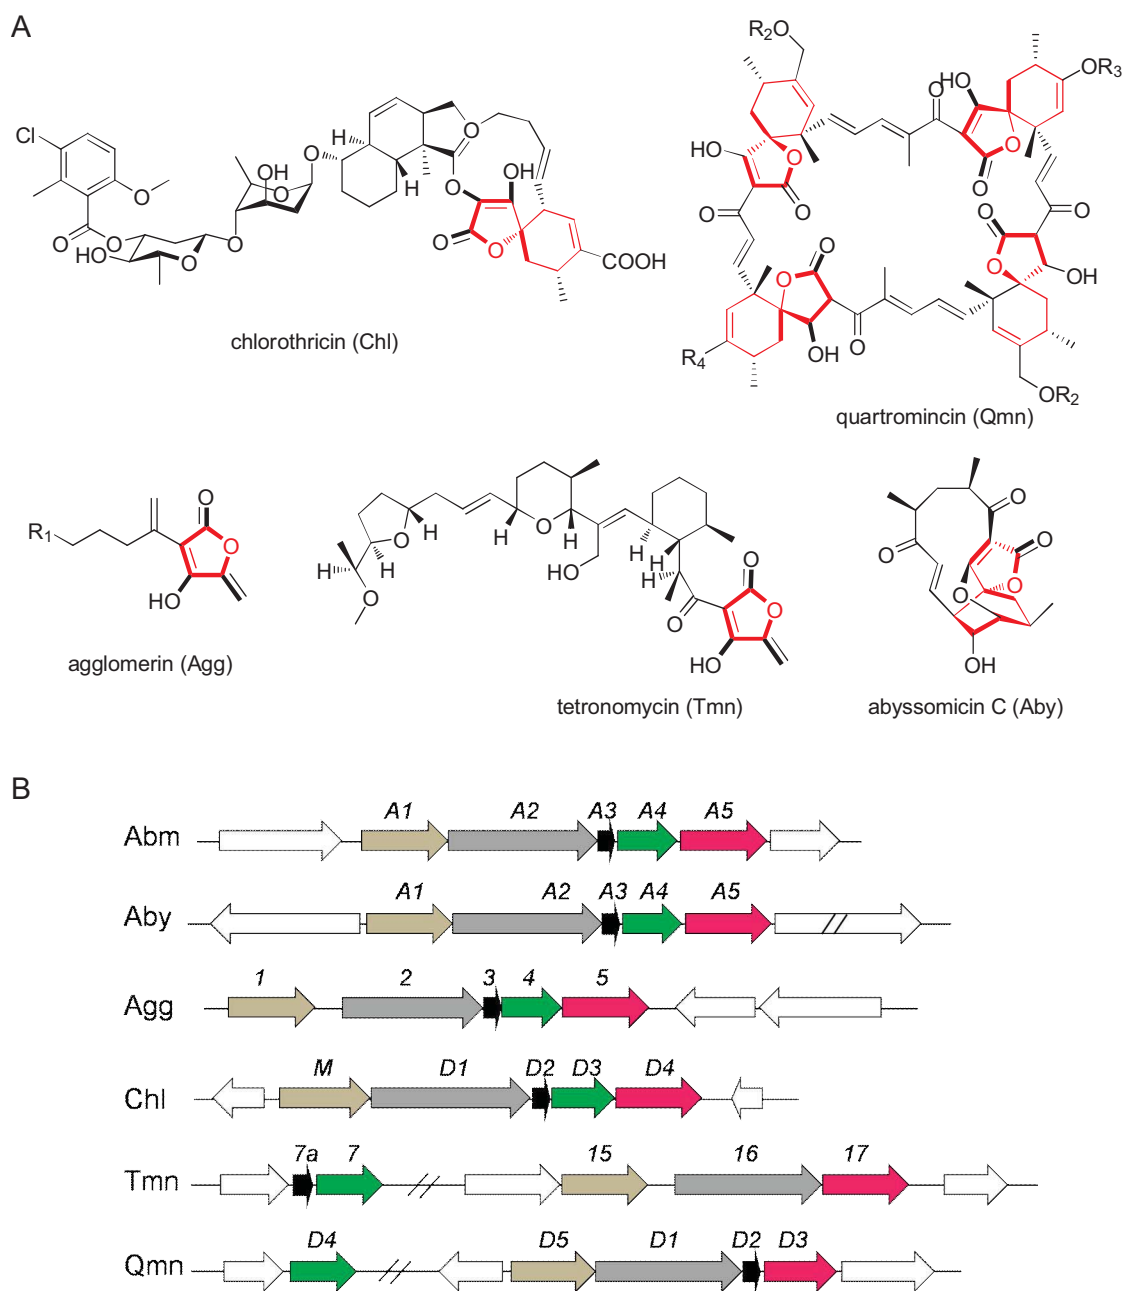

**Fig. S1** Chemical structures of tetronate-containing natural products (A) and the unique set of five highly conserved genes responsible for tetronate biosynthesis (B).

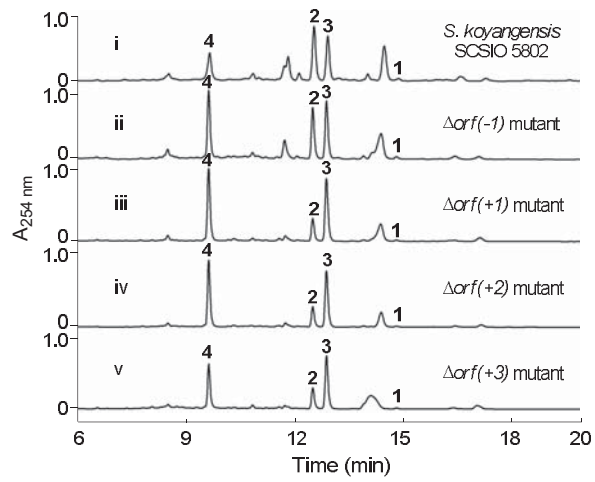

**Fig. S2** HPLC analyses of fermentation extracts. i: wild-type; ii:  $\Delta orf(-1)$  mutant; iii:  $\Delta orf(+1)$  mutant; iv:  $\Delta orf(+2)$  mutant; v:  $\Delta orf(+3)$  mutant.

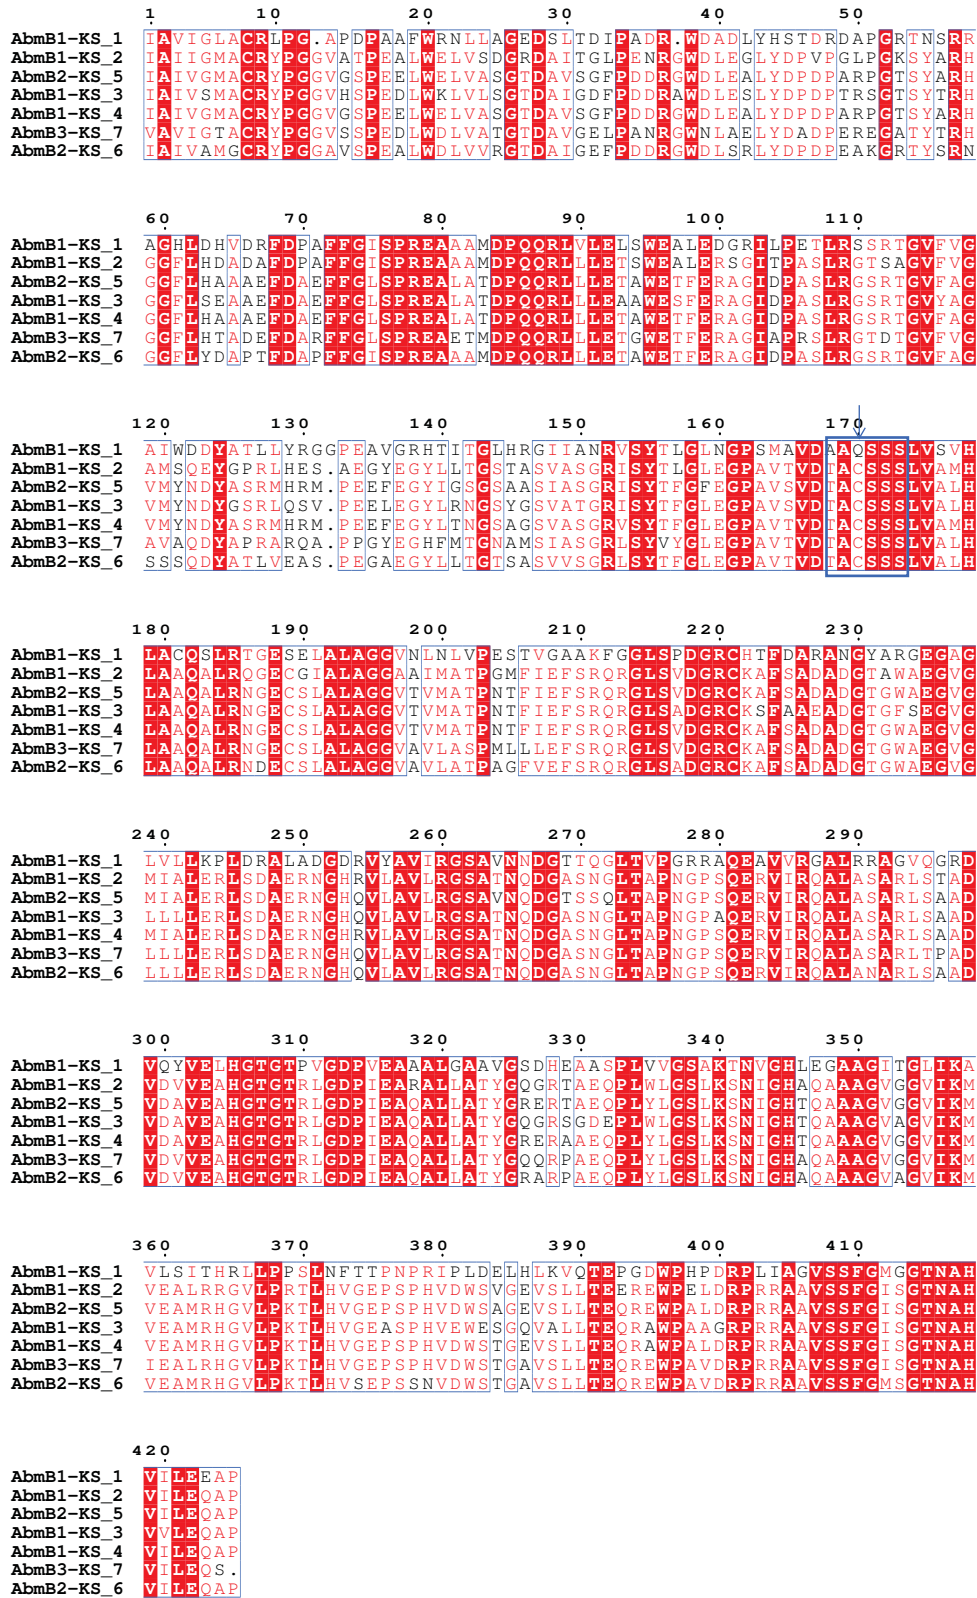

**Fig. S3** Alignments of seven KS domains of AbmB1-B3. The conserved motif of KS domains is indicated by red box. The vertical arrow indicates the replacement of the transthiosterification site Cys (C) of AbmB1-KS\_1 with Gln (Q).

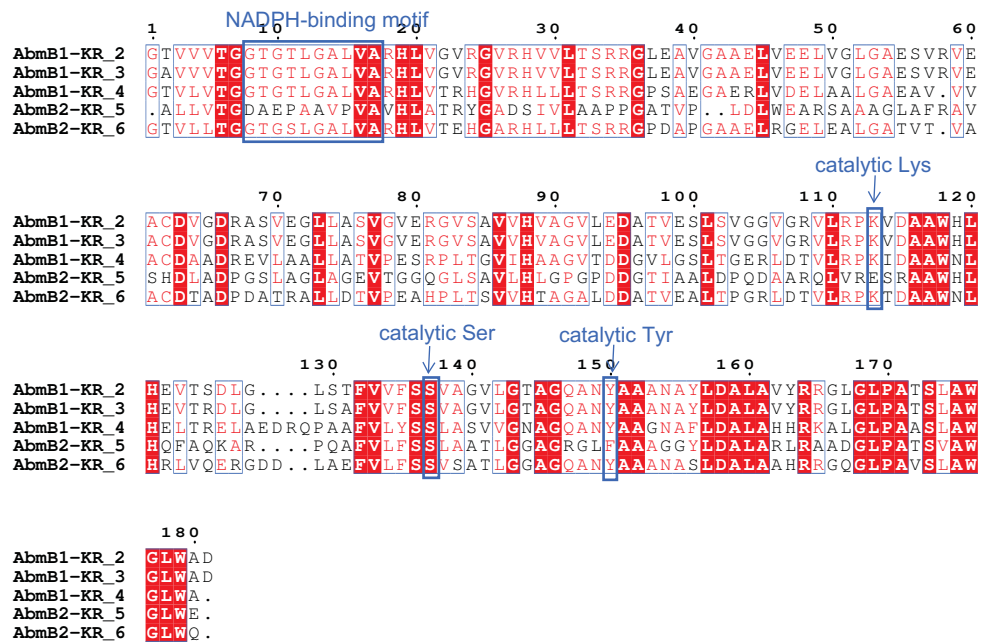

**Fig. S4** Alignments of five KR domains of AbmB1-B2. The NADPH-binding motif of KR domains is indicated by blue box. The vertical arrow indicates the active catalytic amino acids.

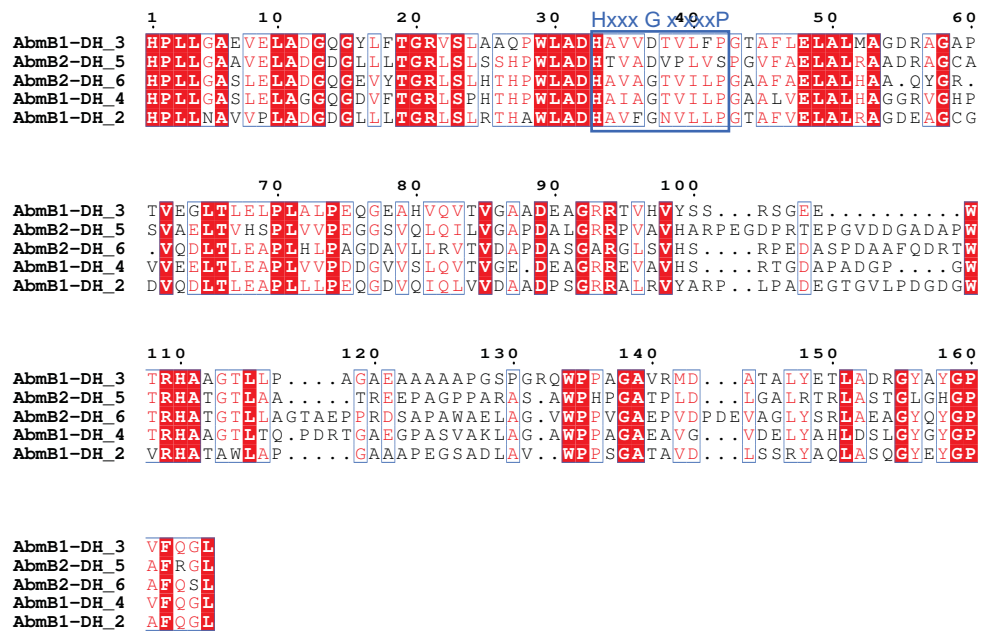

**Fig. S5** Alignments of five DH domains of AbmB1-B2. The conserved mitif HxxxGxxxxP motif is indicated by blue box.

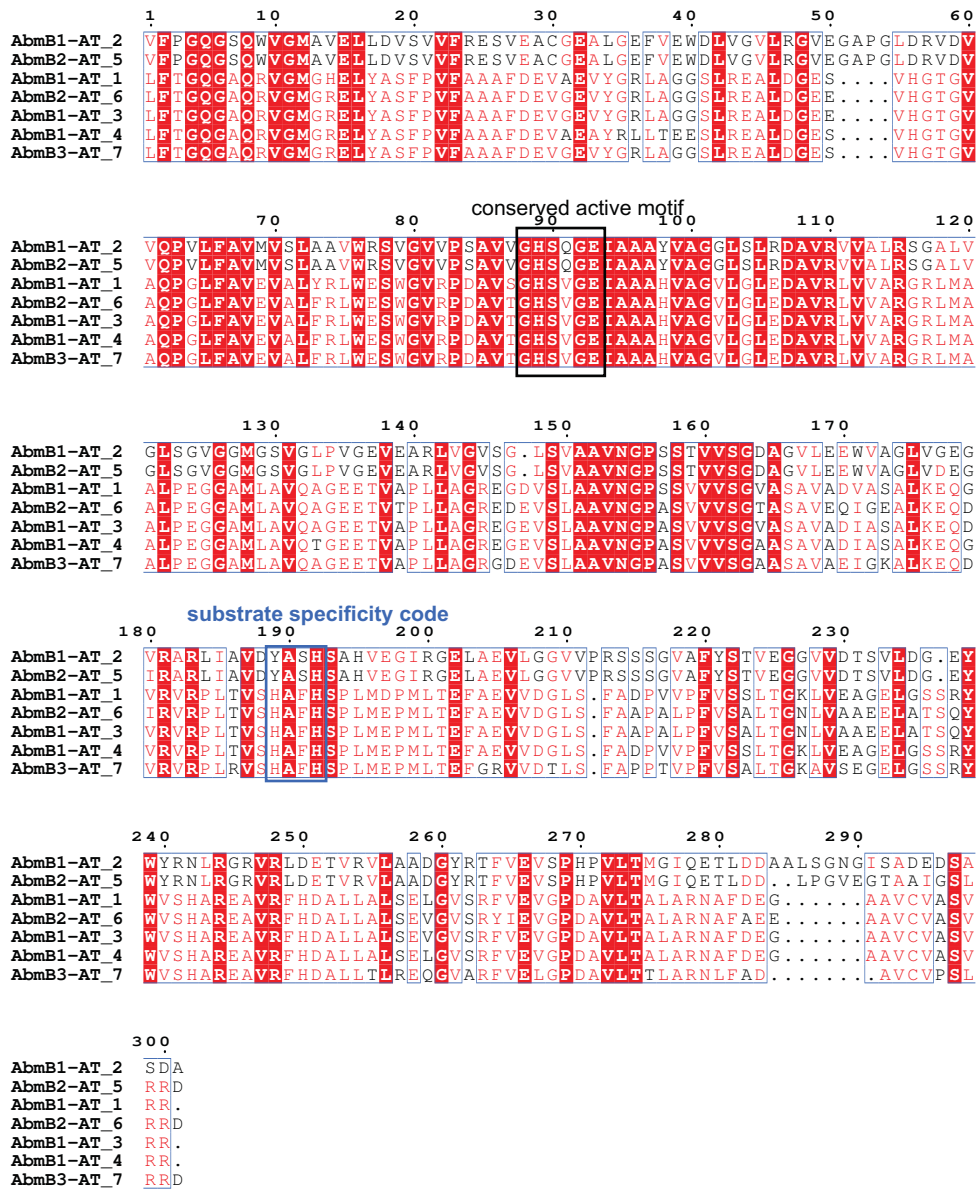

**Fig. S6** Alignments of seven AT domains of AbmB1-B3. The conserved active motif of AT domains is indicated by black box. The red box indicates the motif for the substrate specificity.

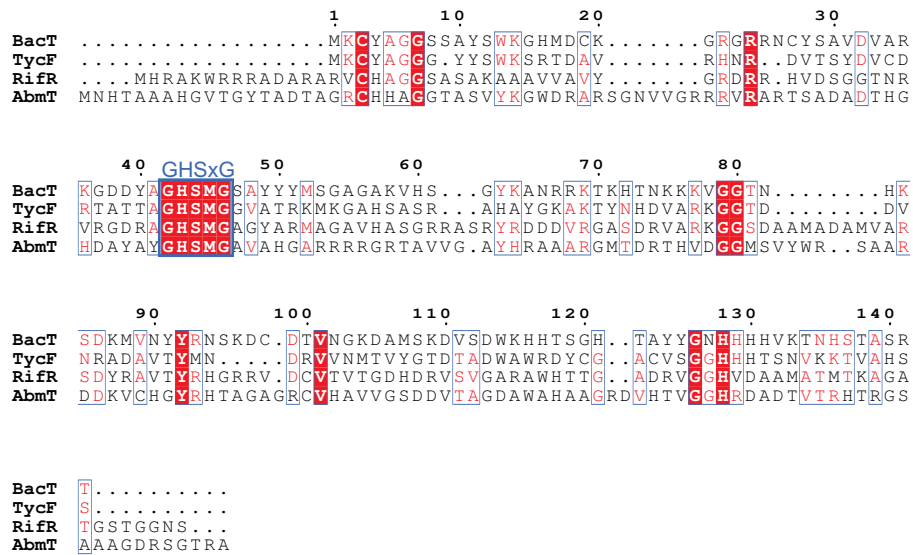

**Fig. S7** Alignments of AbmT with the typical type II TEs. The following type II TEs are used for amino acid alignments: BacT from *Bacillus licheniformis* (AF007865.2); TycF from *Brevibacillus brevis* (AF004835); RifR from *Amycolatopsis mediterranei* S699 (AF040570). The conserved GHSxG motif of type II TEs is indicated by blue box.

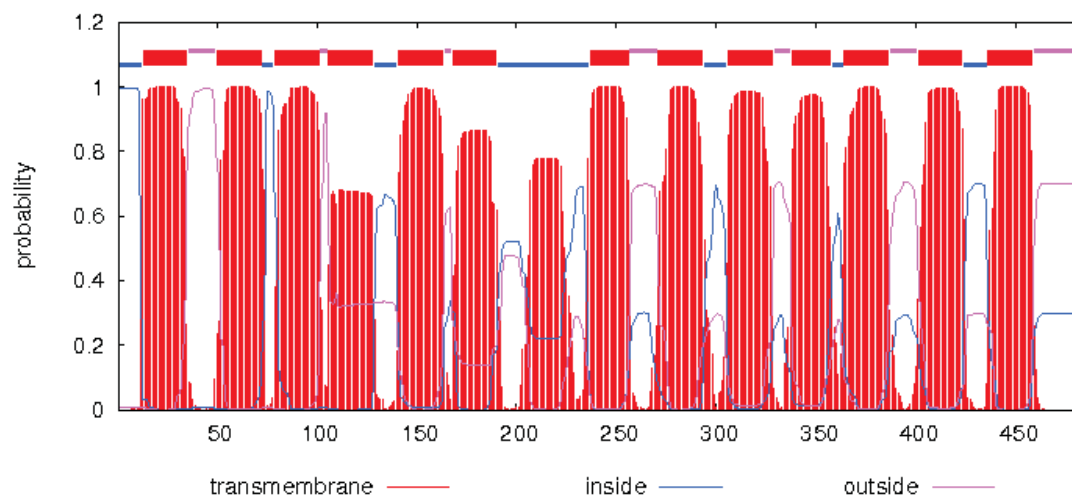

**Fig. S8** The 14 transmembranes helixes of AbmD predicted by HMMTOP pogram.



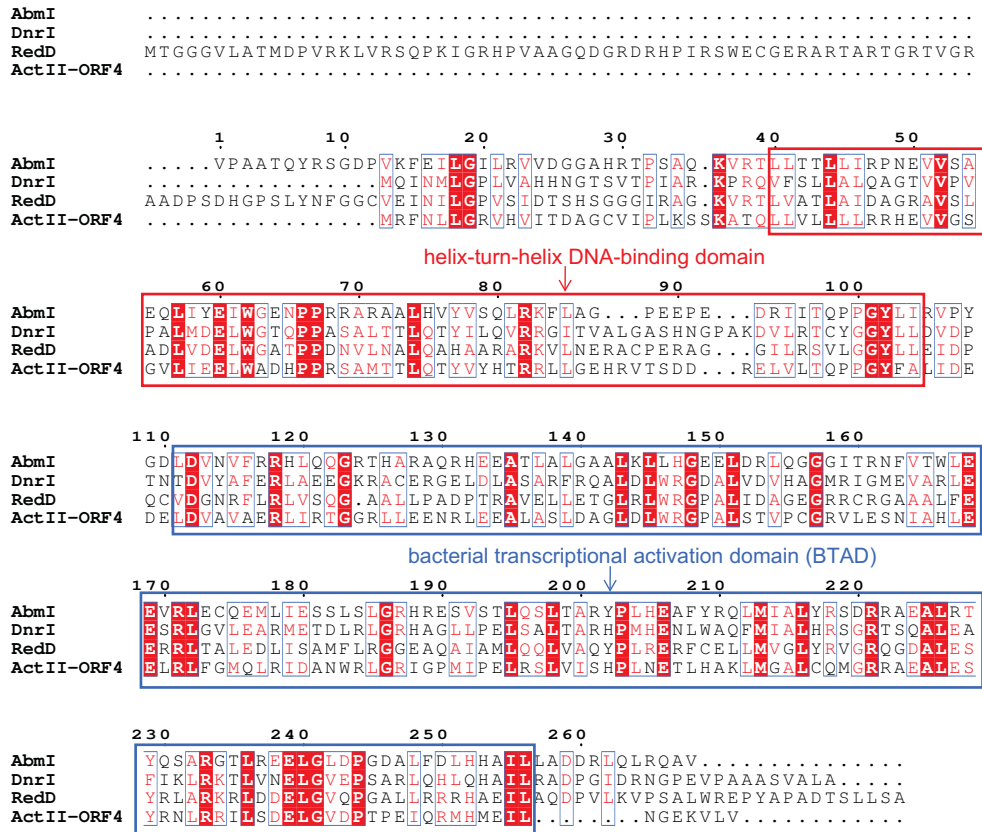

**Fig. S9** Alignments of AbmI with the characterized SARP regulators. The following regulators are used for amino acid alignments: DnrI from *Streptomyces peuceitii* (AAA26736.1); RedD from *Streptomyces coelicolor* A3(2) (AAA88556.1); ActII-ORF4 from *synthetic construct* (AAK32147.1). The conserved HTH DNA-binding domain is indicated by red box, and the conserved BTAD is indicated with blue box.

Walker A  
↓

1            10            20            30            40            GXXXRQK[T/S]

AbmH . . . . .VEALGAIRDGRRVVELVGDPTGKTRLLTQLAAEARSRGLVVAQGRATEGDQRVML  
AveR . . . . .MQGVSKLHPPRKPEELTLVDRETQFRALRLALTECAAGTVKLLVAEGGMGC GKSTFLG  
GdmRI MTAEINSSLRNPPQRLGMSMGLTDYQSRRLRDVLGTAARNGGLLVVQVGGPGV GKATLLS  
NysRI . . . . .MRKQSGSSGLLTLVGRDDELRTLARHAAAARDGRAGLVLLHGPAGMGKTSLLR  
PikD . . . . .MNLVERDGEIAHLRAVLDAASAAGDGTLLLVSGPAGSGKTELLR  
LuxR . . . . .

60            70            80            90            100            110

AbmH K S I T A S L D C R L V L A A S R D L P N D A A A T I R A I W S Q S P V R F G E A F G D G D H E S V P G V A G R E P .  
AveR E A L H T A A A S G F A V L R A A G L P A D H R Q P L G V L Q Q L L N D P A P E D T A R T A V R P M V Q H V R G A . .  
GdmRI S L E E Q A A E S D A V C L T A S G F A E D T A I P F N I V E Q L I R S S A A M G E L D V V A R W R T A G E R Y S E A E  
NysRI S F T A S D V C R G M T V L Y G T C G E T V A G A G Y G G V R E L L G G L G L S G G D A R R S P L L E G L A A R A L P A  
PikD S L R R L A A E R E T P V W S V R A L P G D R D I P L G V L C Q L L R S A E Q H G A D T S A V R D L L D A A S R R A G N  
LuxR . . . . .

Walker B  
↓

120            130            140            150            160

AbmH . . . . . R D L V L S A M R G L L E R L A G . . . . . N S P T V V I L D D S H W A D P Y T T D I L D Q L V R Y P L  
AveR . . . . . L E R L A A . . . . . G A P L A I G I D D V Q D A D P E S L H C L M R L L T R H S P  
GdmRI H G . . . . . M L A M L V R E I S D V L H R I A G . . . . . G K Q L V I A V D D V E H V D Y P S L M C L L H I A R H A S  
NysRI L T A D P A G P D A A T G A Y P V L H G L Y W L A A R L M A Q R P L V L V L D D V H W C D E R S L A W I D F L L R R A E  
PikD L T S P A D A P L R V D E T H R L H D W L L S V S R . . . . . R T P F L V A V D D L T H A D T A S L R F L L Y C A A H H D  
LuxR . . . . .

170            180            190            200            210

AbmH N A P L L I V L A H R P R Q T G S T L R S T L A Q G V V S G V V E R T Q T N E I T L G Q A A D L I S . . . . . V E A R S R  
AveR T S R I L L C T A L A C S P . A A D P V L E A E L M R Q T A F E R I T L D C L S L D G V T G L V S D R C A R P T A P P  
GdmRI G . . . . . T R T L V A M S S . G R T H H L C A R V Q G F H N L Y K V E I G T L S E S G V V R L L E R H A D A D L A D R  
NysRI D L P L L V V L A W R S E A E . P V A P A V L A D I A A Q R R P T V L G L H P L G P D D I G E M V R R V F R T T A A P S  
PikD Q G G I G F V M T E R A S Q R . A G Y R V F R A E L L R Q P H C R N M W L S G L P P S G V R Q L L A H Y Y G P E A A E R  
LuxR . . . . .

220            230            240

AbmH R S V D L Y R E S Q G V P Q Y L L A L A N P . . . . . G D N D E F V Q L  
AveR P A D Y C L T V T G G N P L L L R A L L E E H S E A D A P S A P R P A E P S A L H S P P Q A A P P R P V V G G R F Y Q S  
GdmRI I G A S C H A I S G G N P R L V R A L L H D H L M S . . . . . A P D G S E R E V T V G A E F R D  
NysRI F V S R V A A V S G G N P L A L A R L L D E L R A E G . . . . . V R P D A A G E R R A E V G S H D L A R S  
PikD R A P A Y H A T I G G N P L L L R A L T Q D . . . . . R Q A S H T T L G . . . . . A A G G D E P V H G D A F A Q A  
LuxR . . . . .

250            260            270            280            290            300

AbmH V Q T E A A L L G D D E R R V L E A A A V I D G C F D V T A L A S V A G L E R A R V C V A T R L L N R D L F R H A T P  
AveR V L A C L S R T E T A I R Q T A G A L A V L G G R A R A D L L P Q L L G A S P A S V T R G L R A L E A T G L T T S . . .  
GdmRI S Y R W S L L C H P S L L Q M A Q I L A V L G P Y G S P R R V A G L L E C G E E R A A R A I D V L D S A G L L E D . . .  
NysRI V R C L L E R R P P W V R G V A R A I A V L G . P E C T E L L A A L A G V P A A T V D E A L L V L R R A G I L A A D R .  
PikD V L D C L H R S A E G T L E T A R W L A V L E . Q S D P L L V E R L T G T T A A A V E R H I Q E L A A I G L L D E D . .  
LuxR . . . . .

310            320            330            340            350            360

AbmH A S V M V L R H P L V R D A V Y A A T D G C W R R E A H R R A I D Y L R D C G A P P S E L A H H V A A P D S S D S D D  
AveR . . . . . G R F R H P V A E A A A L D A L D P S R R A H L H R R A A A L Q H H D G A A P R D V A R H L L A A R H A A G P W A  
GdmRI . . . . . G C F R H P A A R S V A L E T L A V E E R A R L G A K A A E L L Y A D G A D P I A V A E L L V T A G K T P D H K G  
NysRI . . . . . V D F V H D V V R S A V L D D V A P P T L A E L R T N A A L L L S D A G R P S E E L A G Q L M L L P V L D Q P N M  
PikD . . . . . G T L G Q P A I R E A A L Q D L P A G E R T E L H R R A A E Q L H R D G A D E D T V A R H L L V G G A P D A P W A  
LuxR . . . . .

370            380            390            400            410            420

AbmH L D T I L R A A E E P L P . G N P E R A I T W L E A A L R L S L P R R Q R G L A L I A L S R A L C V A E R F A D A M P H  
AveR V S V L R D A A E Q S L A Q D D V A S A V S C L E L A Y G A C V R E R E R P E I R I R L A A A F G R T N . I A V A E E H  
GdmRI V A V L W H A A Q K N L D E G R T E E A V A G L R L A R A D L G R R E R L D I R M A L V G A L W A G N . P A A A E P E  
NysRI A A V L R D A A A Q A E S R G A P E A G V R C L Y R V L E V E P D N . . . . . V A V R I Q M A R A L A E I N . P P E A M R L  
PikD L P L L E R G A Q Q A L F D D R L D D A F R I L E F A V R S S T D N T Q L A R L A P H L V A A S W R M N . P H M T T R A  
LuxR . . . . .

430            440            450            460            470            480

AbmH L R E A V A M G A A L . . . . . P V E I W A K A V S Q S A A I D T L F G R Y S E A N A T L D G A L A M L R G R P S L E E V E L  
AveR L A D L V A T L R E G . E L T G . . . . . H Q T A L L V P L L V N H G R L G E A R E A M D R L N A A D D A R G L C A D G G F  
GdmRI L D R L M A A I R T E . S P A D I P E Q Y L C F L L F M V L W F G R F S D V E E A F T W L S G S G S G S N A S M A A L  
NysRI L K E A L S L A G D V R T R A Q V A V Q Y G F T C L A V Q E S P S G V R M L E D A L A E L T A E L G P E P G P V D R E L  
PikD L A . L F D R L L S G . E L P P S . . . . . H P V M A L I R C L V W Y G R L P E A D A D A L S R L R P S S D N D A L E L S . . .  
LuxR . . . . .

490            500            510            520            530

AbmH L V R R G V I G L Y D G G A L D T G T V D L A A R R A Q E F A C H T S T A A A M A L R . . . . . A L K S T S I G  
AveR P M A A P W P S T A H L A A R R D P A A R R D P G T R R D P A D K P F L P R Q S G A P Q P R P E D G R G Q O P T A A L W  
GdmRI R V T R Q W V T F L K P T L I H H F P D Q D P S D R E V D G L W A A N L E H G L Q L S . . . . . V D E L G M E I G  
NysRI R T L V E S V L L I V G A D E K V T I G A V R D R A A R L T M P P G D T P A Q R . . . . . Q M L A M T V L  
PikD . . . . . L T R M W L A A L C P P L L E S L P A T P E P . . . . . E R G V P V R L A P R T T . . . . . A L Q A A G V F  
LuxR . . . . .

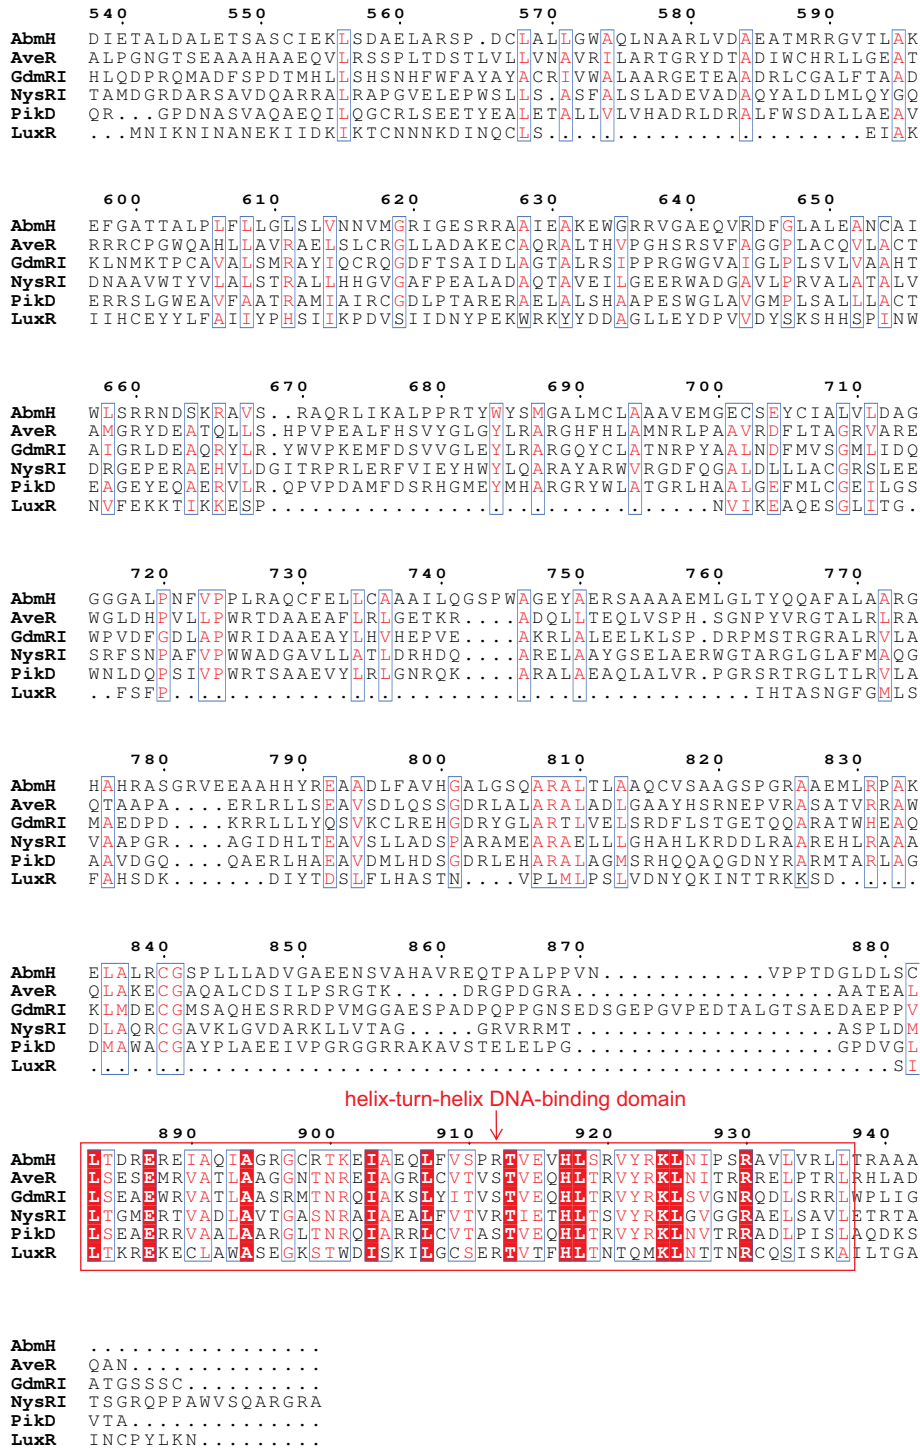

**Fig. S10** Alignments of AbmH with the characterized LuxR-regulators from *Streptomyces avermitilis* (AveR, BAA84600.1), *Streptomyces hygroscopicus* (GdmRI, ABI93791.1), *Streptomyces noursei* ATCC 11455 (NysRI, AAF71778.1), *Streptomyces venezuelae* (PikD, AAC68887.1) and *Vibrio fischeri* ES114 (LuxR, YP\_206883.1). The conserved Walker A motif (GxxxxGK[T/S]) and Walker B motif (hhhhD) (where h is a hydrophobic residue) in the NTP-binding domain is indicated by blue box; the conserved HTH DNA-binding domain is indicated with red box.

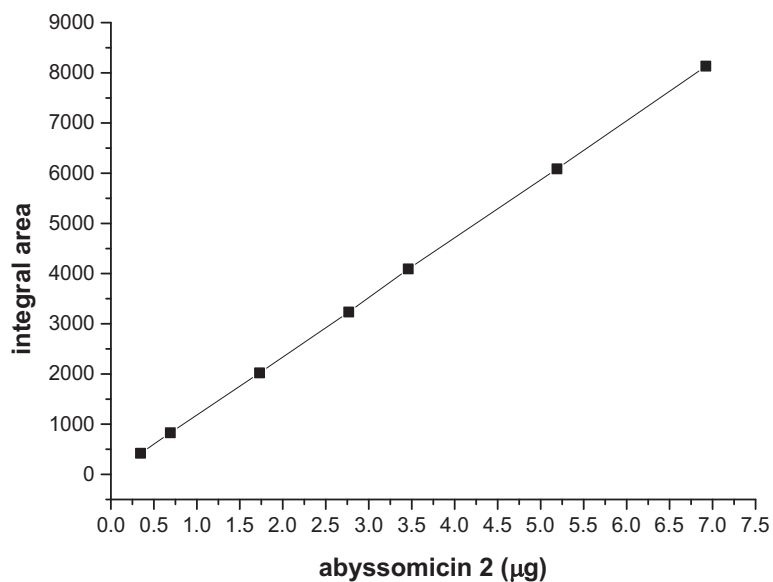

**Fig. S11** The quantitative HPLC standard curve for abyssomicin 2 (**3**). The curve was generated via analysis of a concentration gradient of 0.346 µg, 0.692 µg, 1.730 µg, 2.768 µg, 3.461 µg, 5.191 µg, 6.922 µg of **3**. UV absorptions were maintained below 1 A unit to ensure appropriate confidence of the generated standard curve and avoid deviation from linearity.

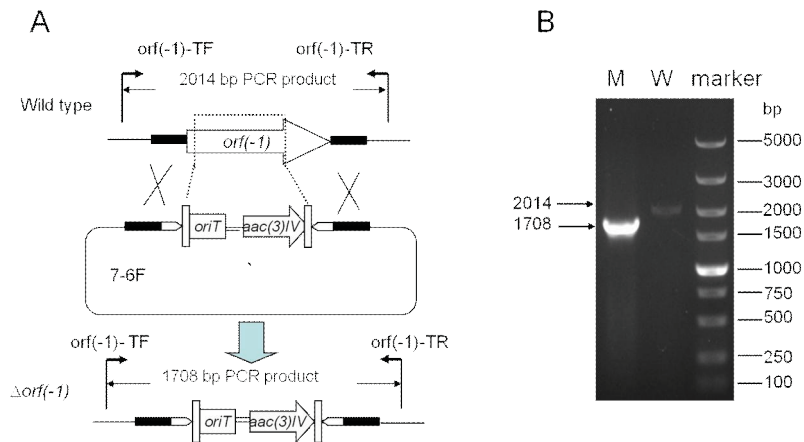

**Fig. S12** Disruption of *orf(-1)* in wild-type *S. koyangensis* SCSIO 5802 via PCR-targeting. (A) Schematic representation for disruption of *orf(-1)*. (B) PCR analyses of the wild-type strain and the of *orf(-1)* double-cross mutant carried out using the primers listed in Table S2. Marker: DNA molecular ladder; W: using the genomic DNA of *S. koyangensis* SCSIO 5802 as template; M: using the genomic DNA of *orf(-1)* mutant as template.

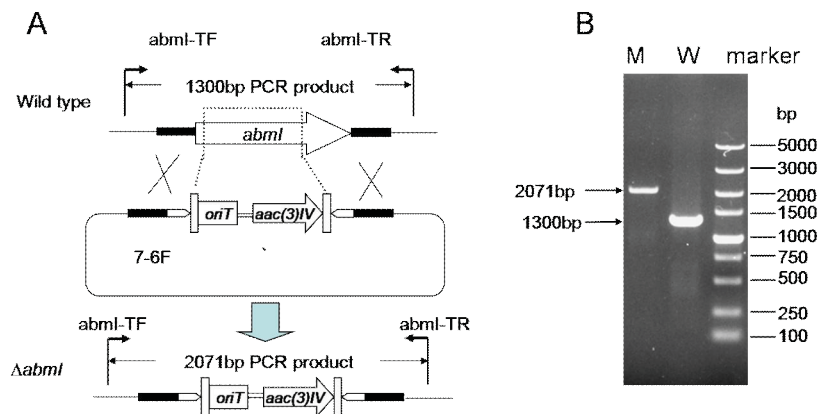

**Fig. S13** Disruption of *abmI* in wild-type *S. koyangensis* SCSIO 5802 via PCR-targeting. (A) Schematic representation for disruption of *abmI*. (B) PCR analyses of the wild-type strain and the of *abmI* double-cross mutant carried out using the primers listed in Table S2. Marker: DNA molecular ladder; W: using the genomic DNA of *S. koyangensis* SCSIO 5802 as template; M: using the genomic DNA of *abmI* mutant as template.

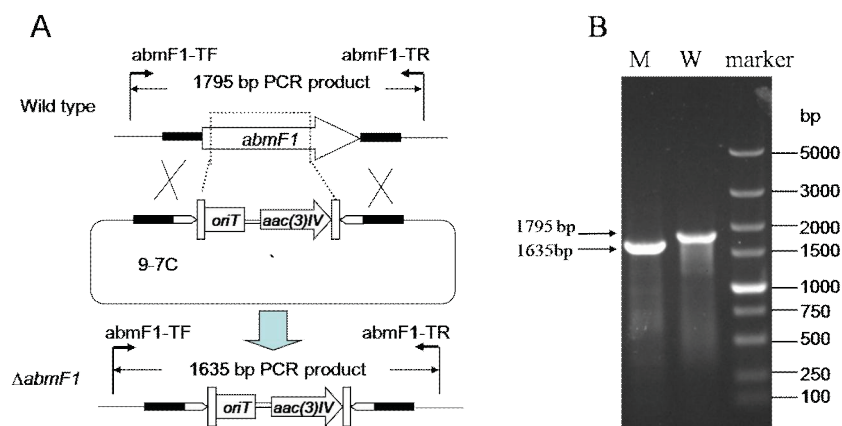

**Fig. S14** Disruption of *abmF1* in wild-type *S. koyangensis* SCSIO 5802 via PCR-targeting. (A) Schematic representation for disruption of *abmF1*. (B) PCR analyses of the wild-type strain and the of *abmF1* double-cross mutant carried out using the primers listed in Table S2. Marker: DNA molecular ladder; W: using the genomic DNA of *S. koyangensis* SCSIO 5802 as template; M: using the genomic DNA of *abmF1* mutant as template.

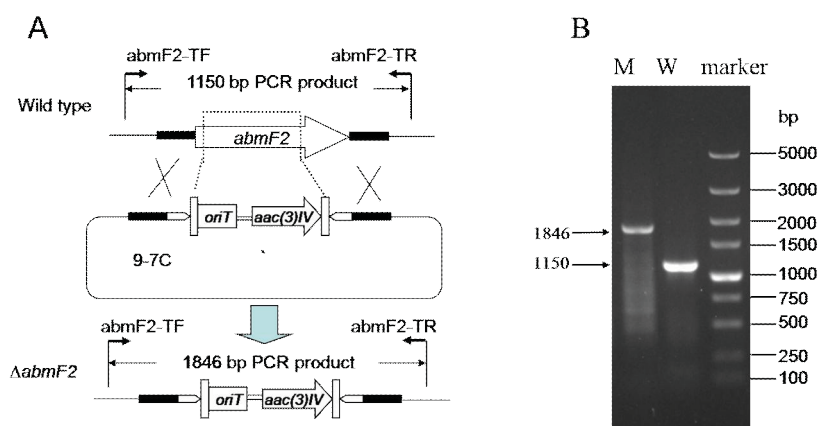

**Fig. S15** Disruption of *abmF2* in wild-type *S. koyangensis* SCSIO 5802 via PCR-targeting. (A) Schematic representation for disruption of *abmF2*. (B) PCR analyses of the wild-type strain and the of *abmF2* double-cross mutant carried out using the primers listed in Table S2. Marker: DNA molecular ladder; W: using the genomic DNA of *S. koyangensis* SCSIO 5802 as template; M: using the genomic DNA of *abmF2* mutant as template.

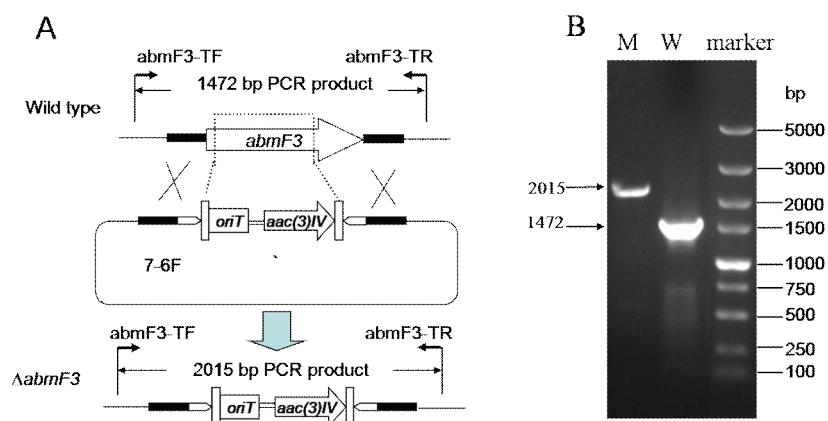

**Fig. S16** Disruption of *abmF3* in wild-type *S. koyangensis* SCSIO 5802 via PCR-targeting. (A) Schematic representation for disruption of *abmF3*. (B) PCR analyses of the wild-type strain and the of *abmF3* double-cross mutant carried out using the primers listed in Table S2. Marker: DNA molecular ladder; W: using the genomic DNA of *S. koyangensis* SCSIO 5802 as template; M: using the genomic DNA of *abmF3* mutant as template.

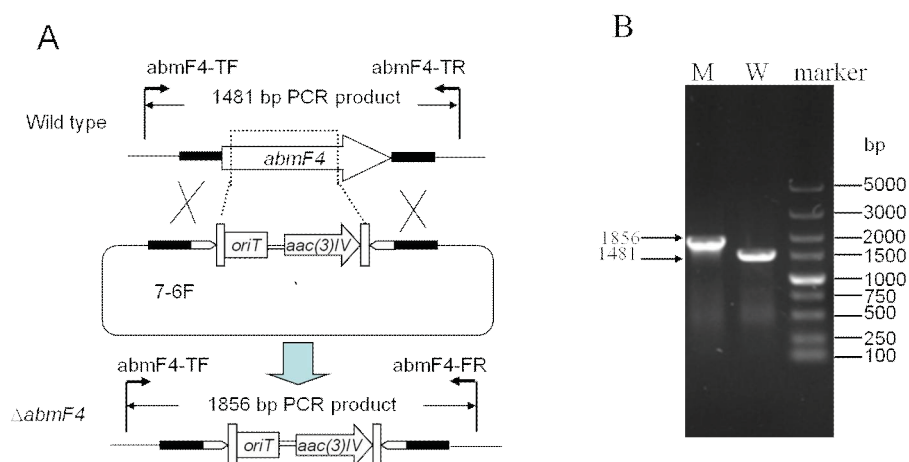

**Fig. S17** Disruption of *abmF4* in wild-type *S. koyangensis* SCSIO 5802 via PCR-targeting. (A) Schematic representation for disruption of *abmF4*. (B) PCR analyses of the wild-type strain and the of *abmF4* double-cross mutant carried out using the primers listed in Table S2. Marker: DNA molecular ladder; W: using the genomic DNA of *S. koyangensis* SCSIO 5802 as template; M: using the genomic DNA of *abmF4* mutant as template.

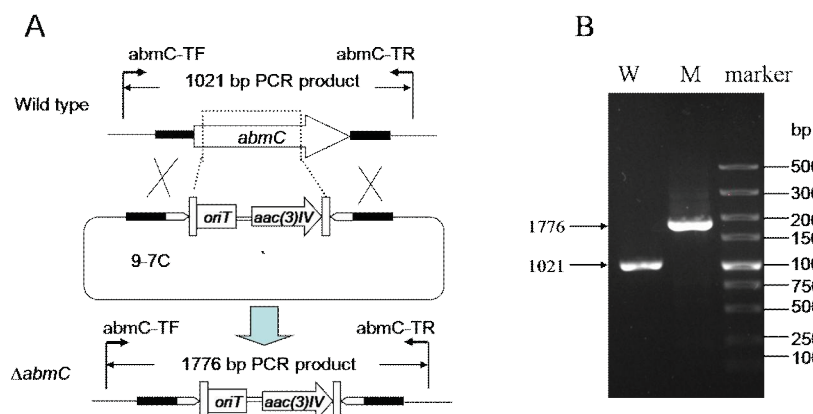

**Fig. S18** Disruption of *abmC* in wild-type *S. koyangensis* SCSIO 5802 via PCR-targeting. (A) Schematic representation for disruption of *abmC*. (B) PCR analyses of the wild-type strain and the of *abmC* double-cross mutant carried out using the primers listed in Table S2. Marker: DNA molecular ladder; W: using the genomic DNA of *S. koyangensis* SCSIO 5802 as template; M: using the genomic DNA of *abmC* mutant as template.

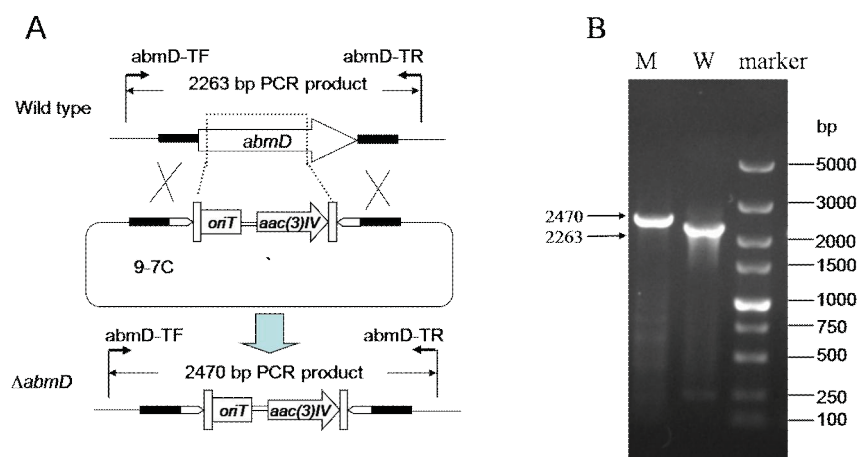

**Fig. S19** Disruption of *abmD* in wild-type *S. koyangensis* SCSIO 5802 via PCR-targeting. (A) Schematic representation for disruption of *abmD*. (B) PCR analyses of the wild-type strain and the of *abmD* double-cross mutant carried out using the primers listed in Table S2. Marker: DNA molecular ladder; W: using the genomic DNA of *S. koyangensis* SCSIO 5802 as template; M: using the genomic DNA of *abmD* mutant as template.



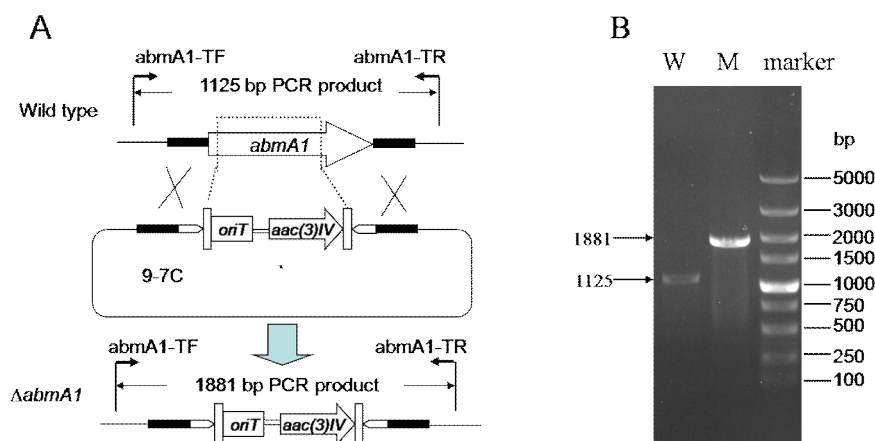

**Fig. S20** Disruption of *abmA1* in wild-type *S. koyangensis* SCSIO 5802 via PCR-targeting. (A) Schematic representation for disruption of *abmA1*. (B) PCR analyses of the wild-type strain and the of *abmA1* double-cross mutant carried out using the primers listed in Table S2. Marker: DNA molecular ladder; W: using the genomic DNA of *S. koyangensis* SCSIO 5802 as template; M: using the genomic DNA of *abmA1* mutant as template.

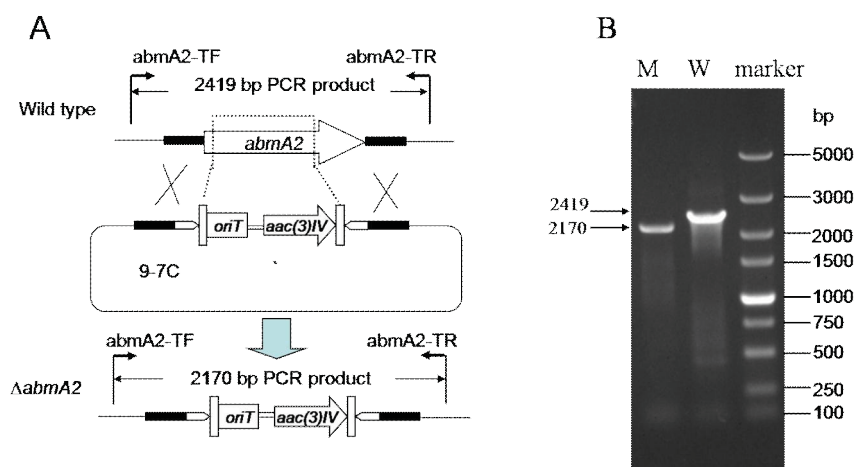

**Fig. S21** Disruption of *abmA2* in wild-type *S. koyangensis* SCSIO 5802 via PCR-targeting. (A) Schematic representation for disruption of *abmA2*. (B) PCR analyses of the wild-type strain and the of *abmA2* double-cross mutant carried out using the primers listed in Table S2. Marker: DNA molecular ladder; W: using the genomic DNA of *S. koyangensis* SCSIO 5802 as template; M: using the genomic DNA of *abmA2* mutant as template.

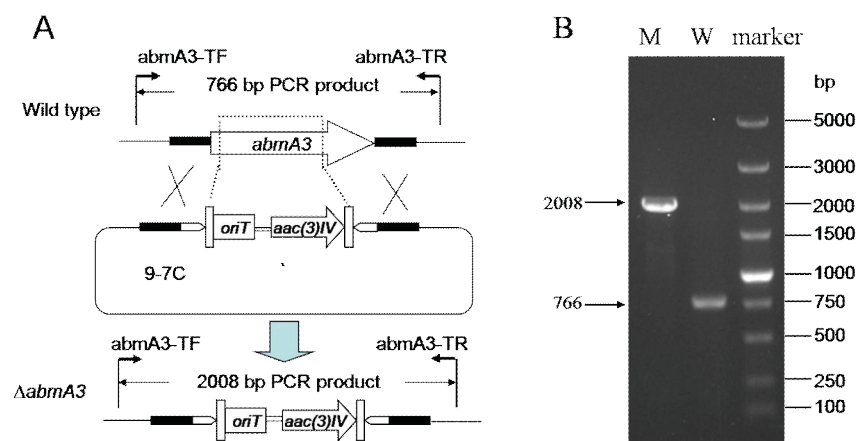

**Fig. S22** Disruption of *abmA3* in wild-type *S. koyangensis* SCSIO 5802 via PCR-targeting. (A) Schematic representation for disruption of *abmA3*. (B) PCR analyses of the wild-type strain and the of *abmA3* double-cross mutant carried out using the primers listed in Table S2. Marker: DNA molecular ladder; W: using the genomic DNA of *S. koyangensis* SCSIO 5802 as template; M: using the genomic DNA of *abmA3* mutant as template.

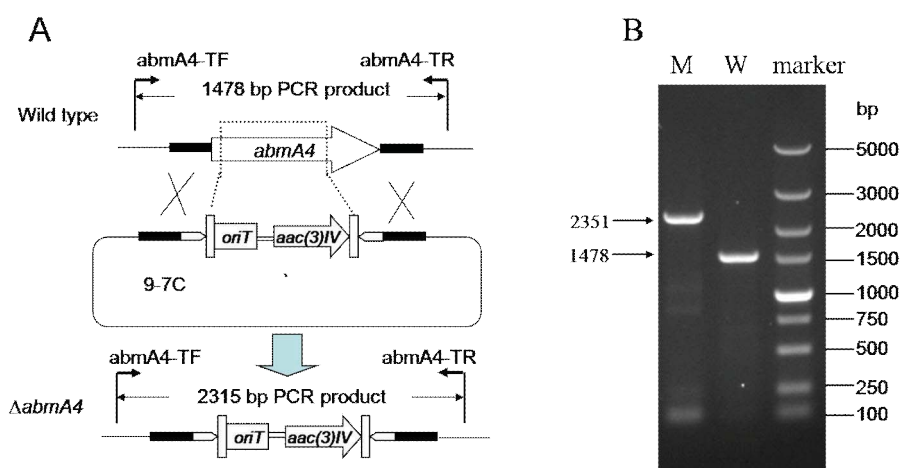

**Fig. S23** Disruption of *abmA4* in wild-type *S. koyangensis* SCSIO 5802 via PCR-targeting. (A) Schematic representation for disruption of *abmA4*. (B) PCR analyses of the wild-type strain and the of *abmA4* double-cross mutant carried out using the primers listed in Table S2. Marker: DNA molecular ladder; W: using the genomic DNA of *S. koyangensis* SCSIO 5802 as template; M: using the genomic DNA of *abmA4* mutant as template.

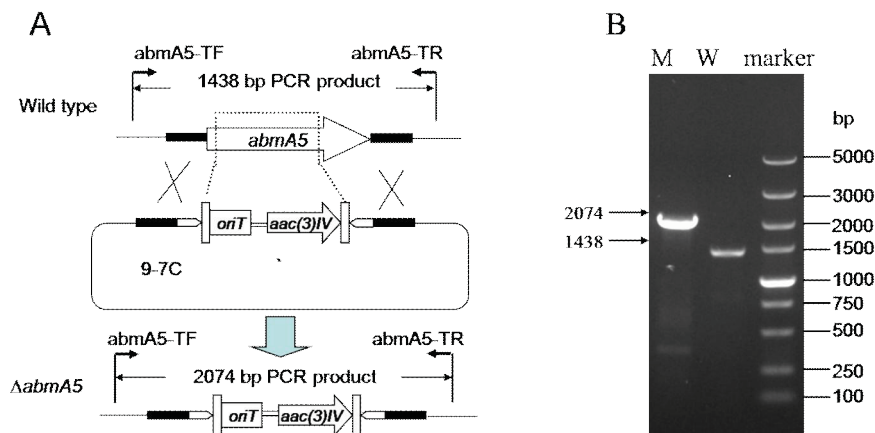

**Fig. S24** Disruption of *abmA5* in wild-type *S. koyangensis* SCSIO 5802 via PCR-targeting. (A) Schematic representation for disruption of *abmA5*. (B) PCR analyses of the wild-type strain and the of *abmA5* double-cross mutant carried out using the primers listed in Table S2. Marker: DNA molecular ladder; W: using the genomic DNA of *S. koyangensis* SCSIO 5802 as template; M: using the genomic DNA of *abmA5* mutant as template.

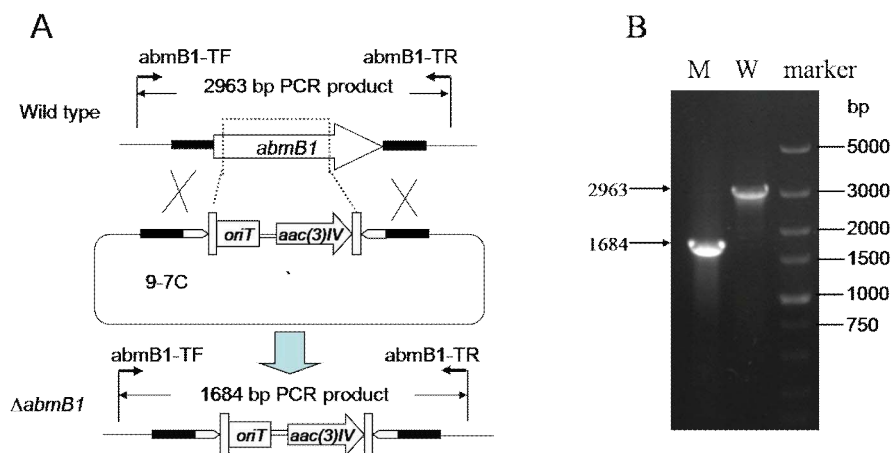

**Fig. S25** Disruption of *abmB1* in wild-type *S. koyangensis* SCSIO 5802 via PCR-targeting. (A) Schematic representation for disruption of *abmB1*. (B) PCR analyses of the wild-type strain and the of *abmB1* double-cross mutant carried out using the primers listed in Table S2. Marker: DNA molecular ladder; W: using the genomic DNA of *S. koyangensis* SCSIO 5802 as template; M: using the genomic DNA of *abmB1* mutant as template.

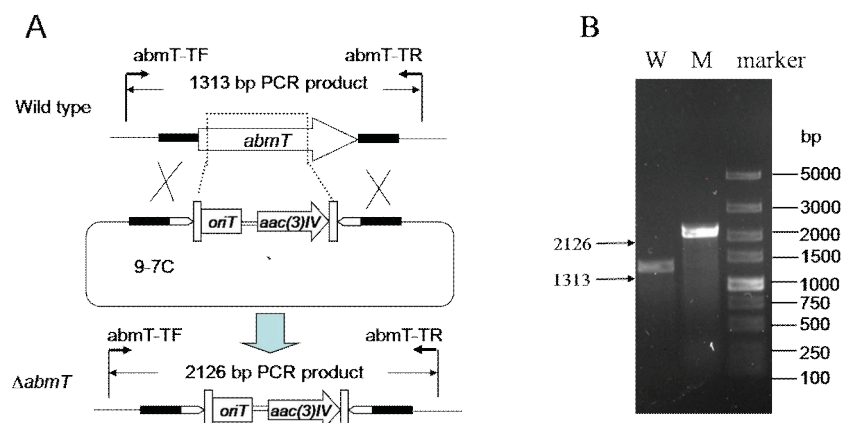

**Fig. S26** Disruption of *abmT* in wild-type *S. koyangensis* SCSIO 5802 via PCR-targeting. (A) Schematic representation for disruption of *abmT*. (B) PCR analyses of the wild-type strain and the of *abmT* double-cross mutant carried out using the primers listed in Table S2. Marker: DNA molecular ladder; W: using the genomic DNA of *S. koyangensis* SCSIO 5802 as template; M: using the genomic DNA of *abmT* mutant as template.

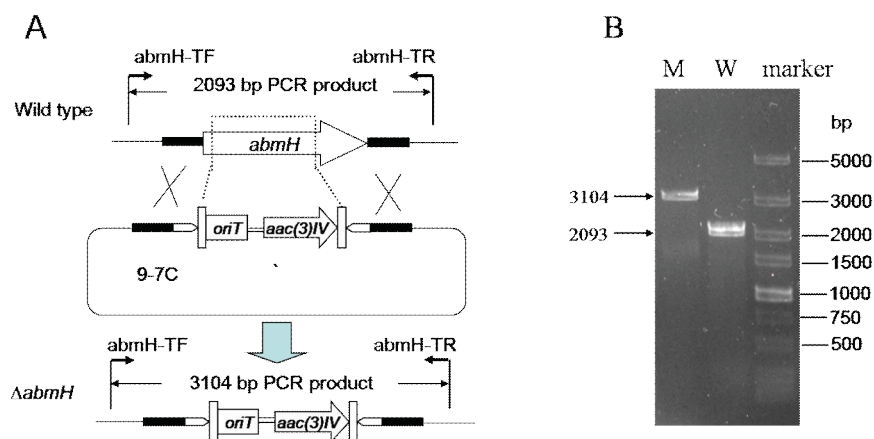

**Fig. S27** Disruption of *abmH* in wild-type *S. koyangensis* SCSIO 5802 via PCR-targeting. (A) Schematic representation for disruption of *abmH*. (B) PCR analyses of the wild-type strain and the of *abmH* double-cross mutant carried out using the primers listed in Table S2. Marker: DNA molecular ladder; W: using the genomic DNA of *S. koyangensis* SCSIO 5802 as template; M: using the genomic DNA of *abmH* mutant as template.

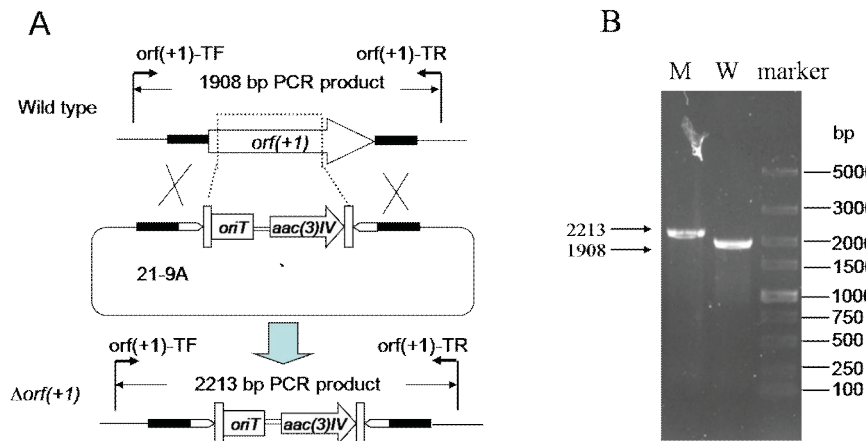

**Fig. S28** Disruption of *orf(+1)* in wild-type *S. koyangensis* SCSIO 5802 via PCR-targeting. (A) Schematic representation for disruption of *orf(+1)*. (B) PCR analyses of the wild-type strain and the of *orf(+1)* double-cross mutant carried out using the primers listed in Table S2. Marker: DNA molecular ladder; W: using the genomic DNA of *S. koyangensis* SCSIO 5802 as template; M: using the genomic DNA of *orf(+1)* mutant as template.

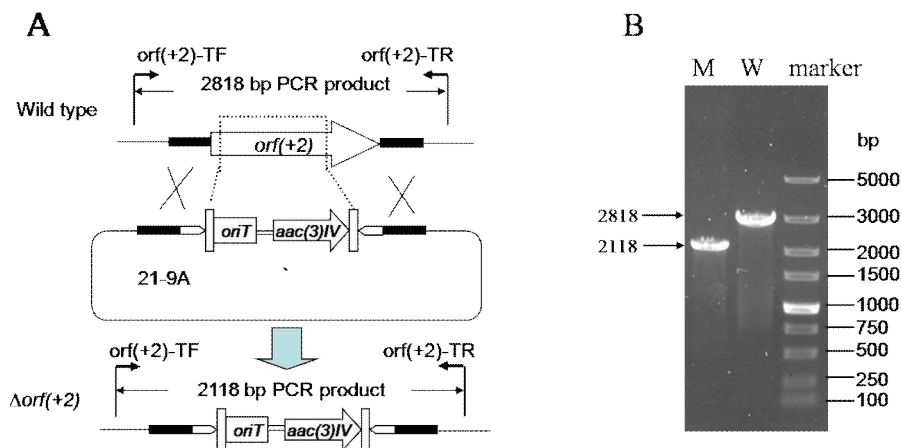

**Fig. S29** Disruption of *orf(+2)* in wild-type *S. koyangensis* SCSIO 5802 via PCR-targeting. (A) Schematic representation for disruption of *orf(+2)*. (B) PCR analyses of the wild-type strain and the of *orf(+2)* double-cross mutant carried out using the primers listed in Table S2. Marker: DNA molecular ladder; W: using the genomic DNA of *S. koyangensis* SCSIO 5802 as template; M: using the genomic DNA of *orf(+2)* mutant as template.

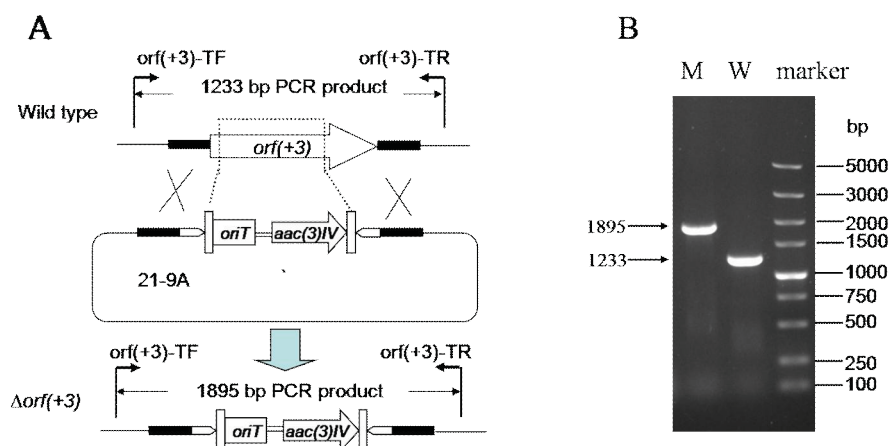

**Fig. S30** Disruption of *orf(+3)* in wild-type *S. koyangensis* SCSIO 5802 via PCR-targeting. (A) Schematic representation for disruption of *orf(+3)*. (B) PCR analyses of the wild-type strain and the of *orf(+3)* double-cross mutant carried out using the primers listed in Table S2. Marker: DNA molecular ladder; W: using the genomic DNA of *S. koyangensis* SCSIO 5802 as template; M: using the genomic DNA of *orf(+3)* mutant as template.

### Supplementary References

1. Datsenko KA, Wanner BL. One-step inactivation of chromosomal genes in *Escherichia coli* K-12 using PCR products. *Proc Natl Acad Sci U S A*. 2000;97:6640-5.
2. MacNeil DJ, Gewain KM, Ruby CL, Dezeny G, Gibbons PH, MacNeil T. Analysis of *Streptomyces avermitilis* genes required for avermectin biosynthesis utilizing a novel integration vector. *Gene*. 1992;111:61-8.
3. Gust B, Challis GL, Fowler K, Kieser T, Chater KF. PCR-targeted *Streptomyces* gene replacement identifies a protein domain needed for biosynthesis of the sesquiterpene soil odor geosmin. *Proc Natl Acad Sci U S A*. 2003;100:1541-6.
4. Hong B, Phornphisutthimas S, Tilley E, Baumberg S, McDowall KJ. Streptomycin production by *Streptomyces griseus* can be modulated by a mechanism not associated with change in the *adpA* component of the A-factor cascade. *Biotechnol Lett*. 2007;29:57-64.
